# Supplementary material for: Picosecond dynamics of hydrogen bond rearrangements during phase separation of a triethylamine and water mixture
Source: Royal Society of Chemistry journal article supplement (doi:10.1039/c4pp00048j), 2014-04-22
Supplement: c4pp00048j1.pdf [file c4pp00048j1.pdf]

Supporting Information

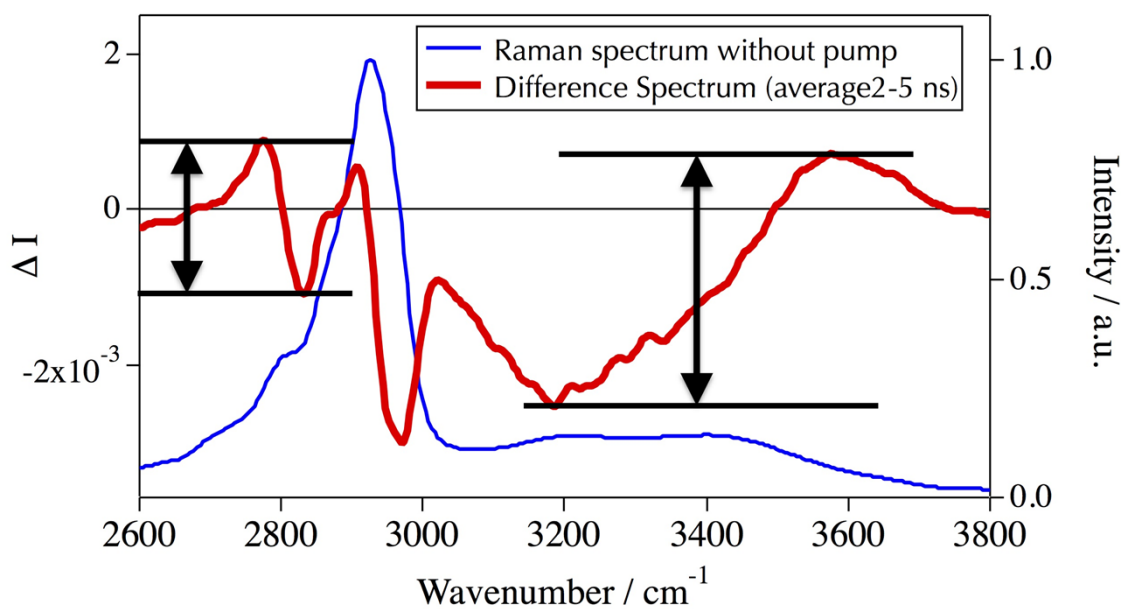

SI.1 Definition of  $\Delta\Delta I$ . Based on the averaged difference spectrum (2-5 ns), we determined the peak position of differential shaped peak. For the methylene CH region, the peak intensity at 2775 cm<sup>-1</sup> (positive) and 2828 cm<sup>-1</sup> (negative) were adopted and the  $\Delta\Delta I$  value was calculated for each delay time.

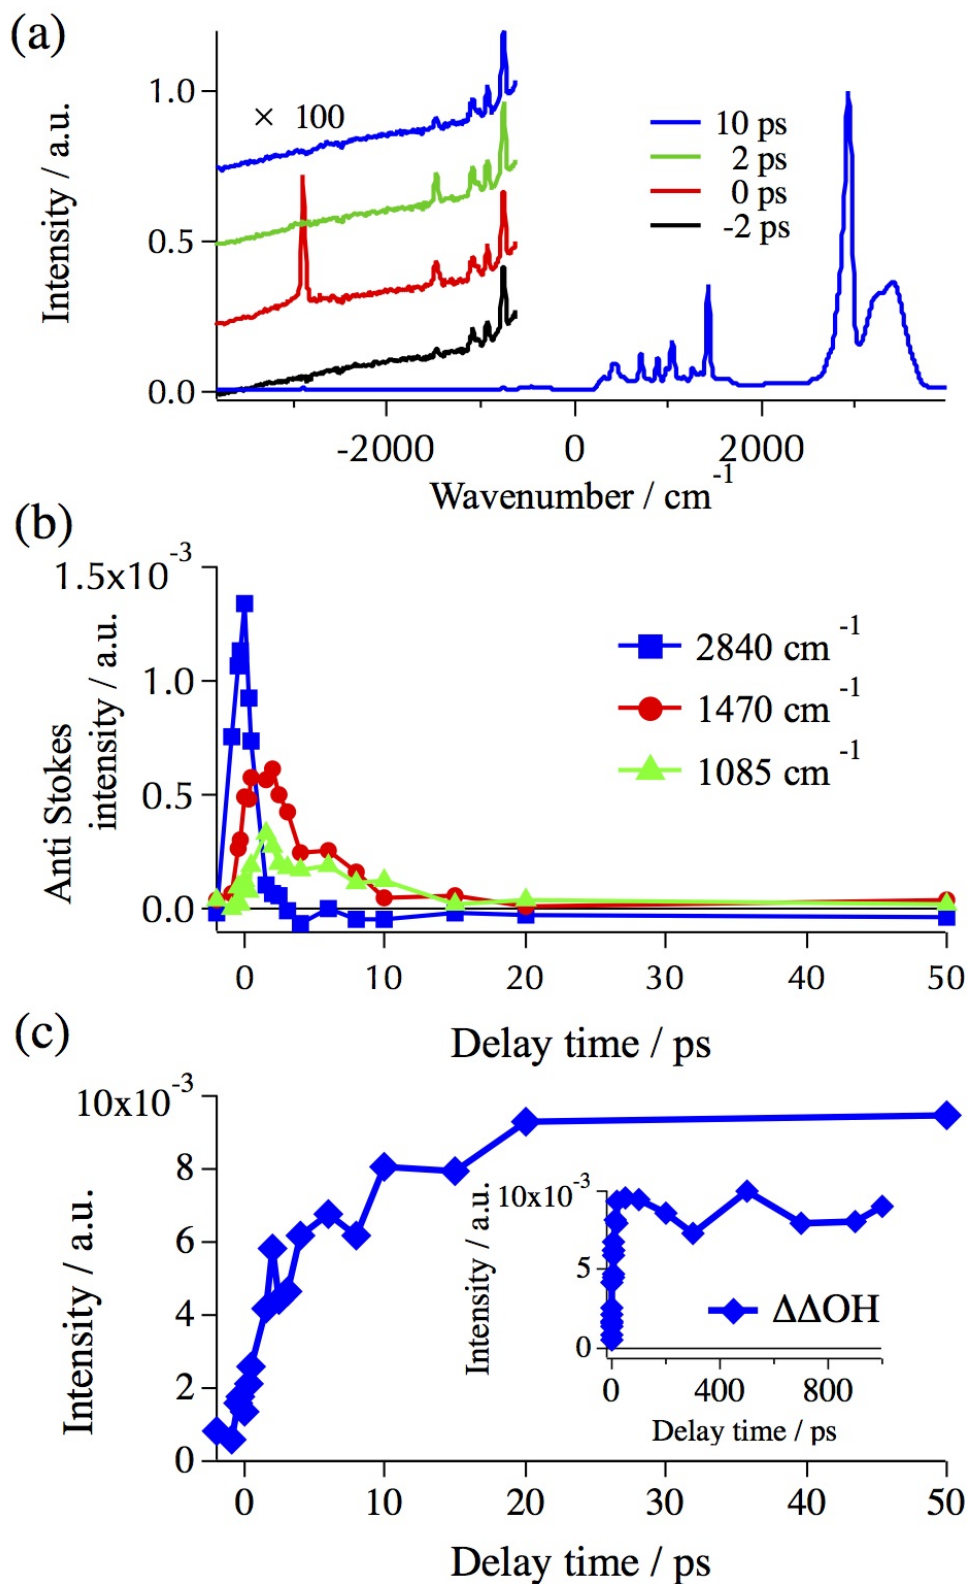

S2. Raman spectra of TEA-water mixture (critical composition) at several delay times (a), time evolution of anti-Stokes intensity (b), and  $\Delta\Delta\text{I}$  at the OH stretching region (c) after the CH stretching pumping at  $2840 \text{ cm}^{-1}$ .
